# Supplementary material
Source: ML conference proceedings conference paper supplement (https://openreview.net/forum?id=Oazgf8A24z)

Weekly Mean Temperature [ $^{\circ}\text{C}$ ]

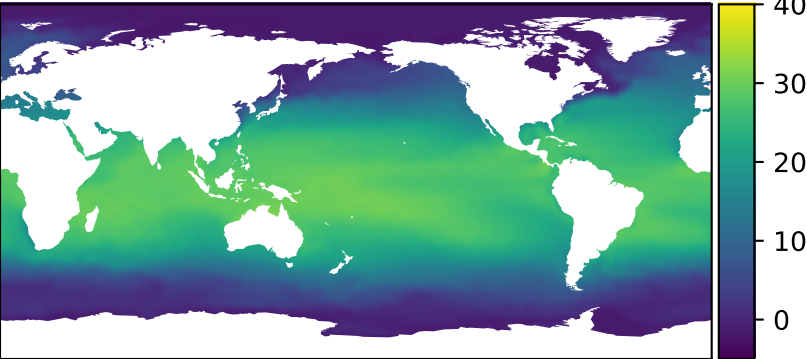

Supplement: supplementary_material [file attachment]

Error [ $^{\circ}\text{C}$ ]

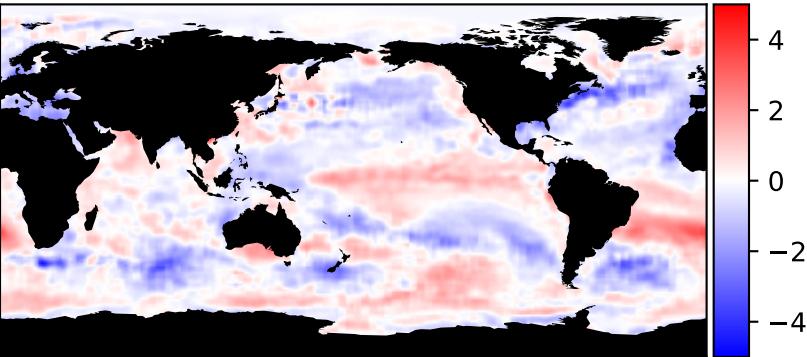

Supplement: supplementary_material [file attachment]

Mean Squared Error (MSE)

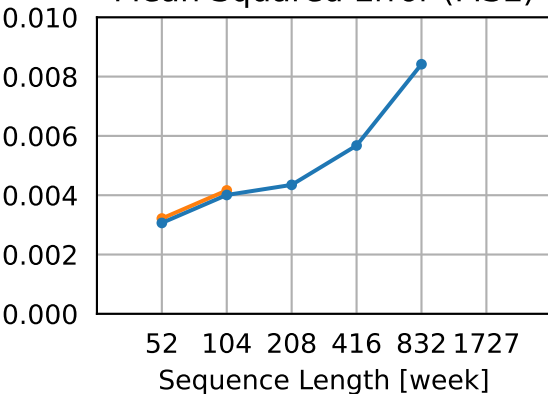

Time per Epoch [s]

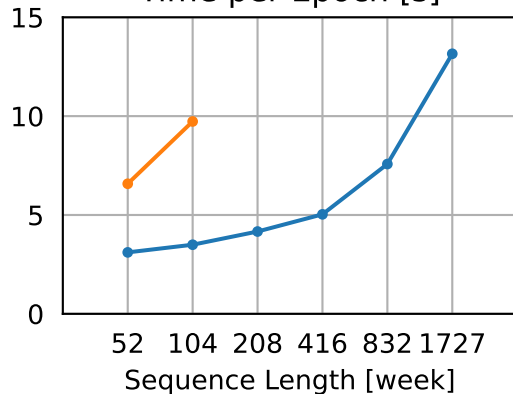

GPU Memory Usage [GiB]

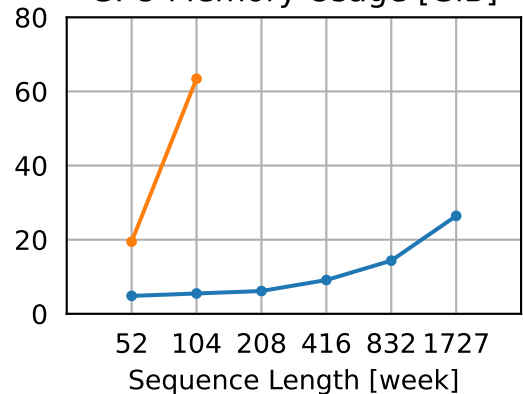

—●— S-MNN    —●— MNN Dense

Supplement: supplementary_material [file attachment]

Weekly Mean Temperature [ $^{\circ}\text{C}$ ]

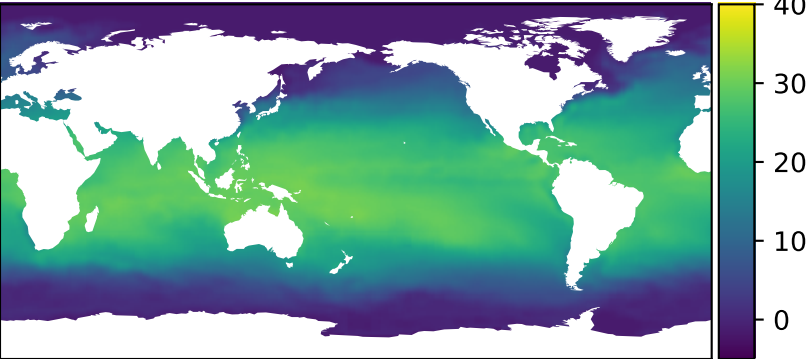

Supplement: supplementary_material [file attachment]
